# Supplementary material for: A novel immunochromatographic strips assay for rapid and simple detection of systemic lupus erythematosus
Source: PubMed Central journal article supplement (PMC7447788; doi:10.1038/s41598-020-71137-0), 2020-08-25
Supplement: 41598_2020_71137_MOESM1_ESM.pdf [file 41598_2020_71137_MOESM1_ESM.pdf]

**A novel immunochromatographic strips assay for rapid and simple detection of systemic  
lupus erythematosus**

Yuhan Sun<sup>1,†</sup>, Zhi Li<sup>2,†</sup>, Wei Liang<sup>1</sup>, Yanlong Zhang<sup>3</sup>, Wanli Song<sup>1</sup>, Jiazhe Song<sup>1</sup>, Kai Xue<sup>1</sup>,  
Meiling Wang<sup>2</sup>, Wenying Sun<sup>2</sup>, Jianguo Gu<sup>4</sup>, Ming Li<sup>1,\*</sup>, and Wenzhe Li<sup>1,\*</sup>

<sup>1</sup>College of Basic Medical Science, Dalian Medical University, 9-Western Section, Lvshun South Road, Dalian, Liaoning 116044, China; <sup>2</sup> Clinical Laboratory, Dalian Municipal Central Hospital, 826-Xinan Road, Shahekou District, Dalian, Liaoning 116033, China; <sup>3</sup> Department of Wildlife Medicine, College of Wildlife Resources, Northeast Forestry University, 26-Hexing Road, Harbin, Heilongjiang 150040,China; <sup>4</sup> Institute of Molecular Biomembrane and Glycobiology, Tohoku Medical and Pharmaceutical University, Sendai, Miyagi 981-8558, Japan

\* To whom correspondence should be addressed. Tel: +86-411-86118660; Fax: +86-411-86110282; E-mail:vivianmarat@163.com, liwenzhe@dmu.edu.cn

† These authors contributed equally to the work.

- 1. Supplementary Figure 1: ESI-MS spectrometry of N-glycan structure on the IgG**
- 2. Supplementary Figure 2: The full-length blots of Figure 2.**
- 3. Supplementary Figure 3: The full-length blots of Figure 3.**
- 4. Supplementary Figure 4: The full-length gel and blots of Figure 4.**
- 5. Supplementary Figure 5: The full-length gel and blots of Figure 5.**
- 6. Supplementary Table 1: Clinical characteristics of patients with autoimmune disease.**
- 7. Supplementary Table 2: Clinical characteristics of patients with SLE**

## Supplementary Figure 1

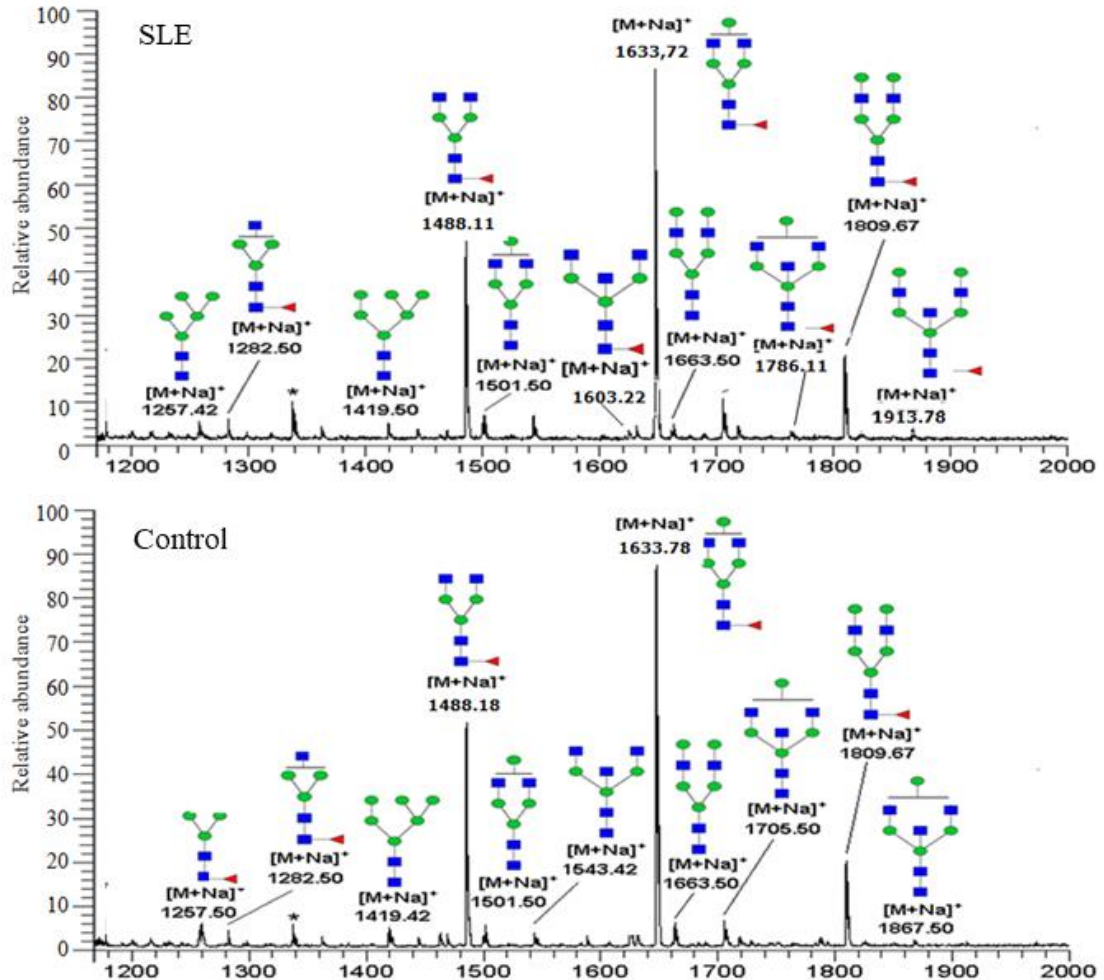

**Supplementary Figure 1.** ESI-MS spectrometry of N-glycan structure on the IgG in the sera of SLE patients and healthy controls. The serum samples (n =3) were mixed and the N-glycan samples were injected via a Rheodyne loop with a colume of 2  $\mu$ l and subsequently brought into the electrospray ion source by a stream of 50% methanol (v/v) at a flow rate of 200  $\mu$ l/min. Triangle, fucose; Square, N-acetylglucosamine; circle, mannose.

**Supplementary Figure 2**

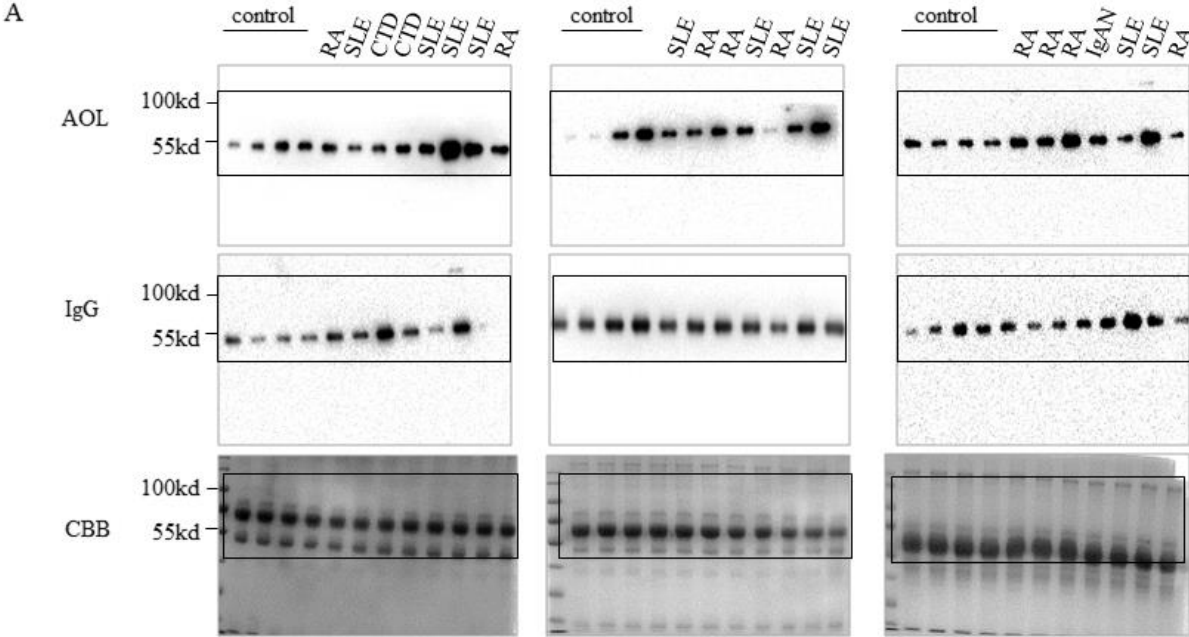

**Supplementary Figure 2:** The full-length gel and blots of Figure 2. (A) The full-length blots of Figure 2A in this manuscript. Boxed regions were cropped and shown as the figure.

# Supplementary Figure 3

A

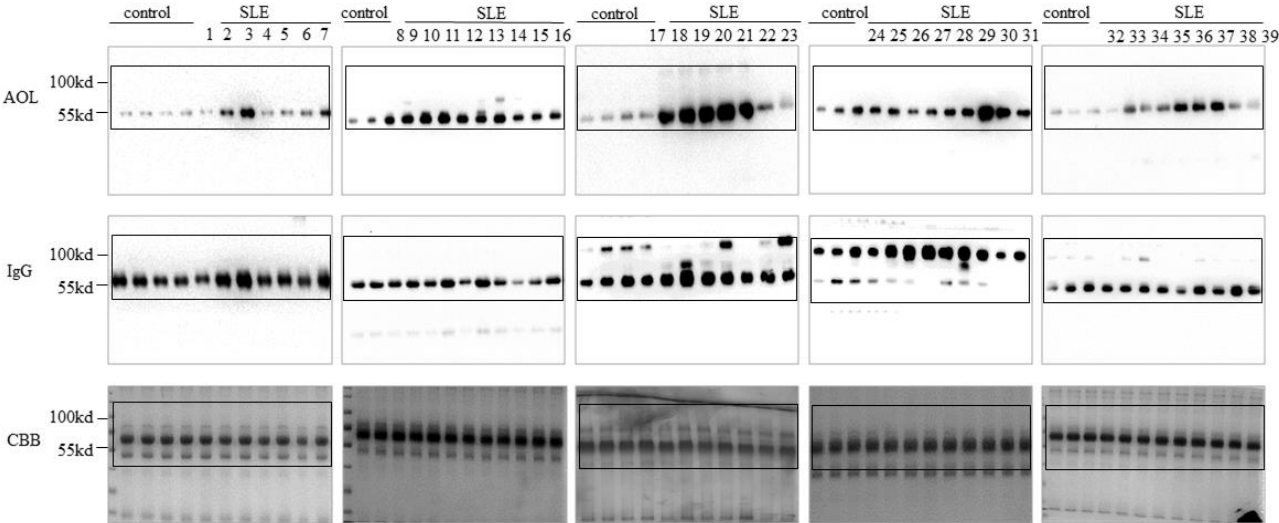

**Supplementary Figure 3:** The full-length gel and blots of Figure 3. (A) The full-length blots of Figure 3A in this manuscript. Boxed regions were cropped and shown as the figure.

**Supplementary Figure 4**

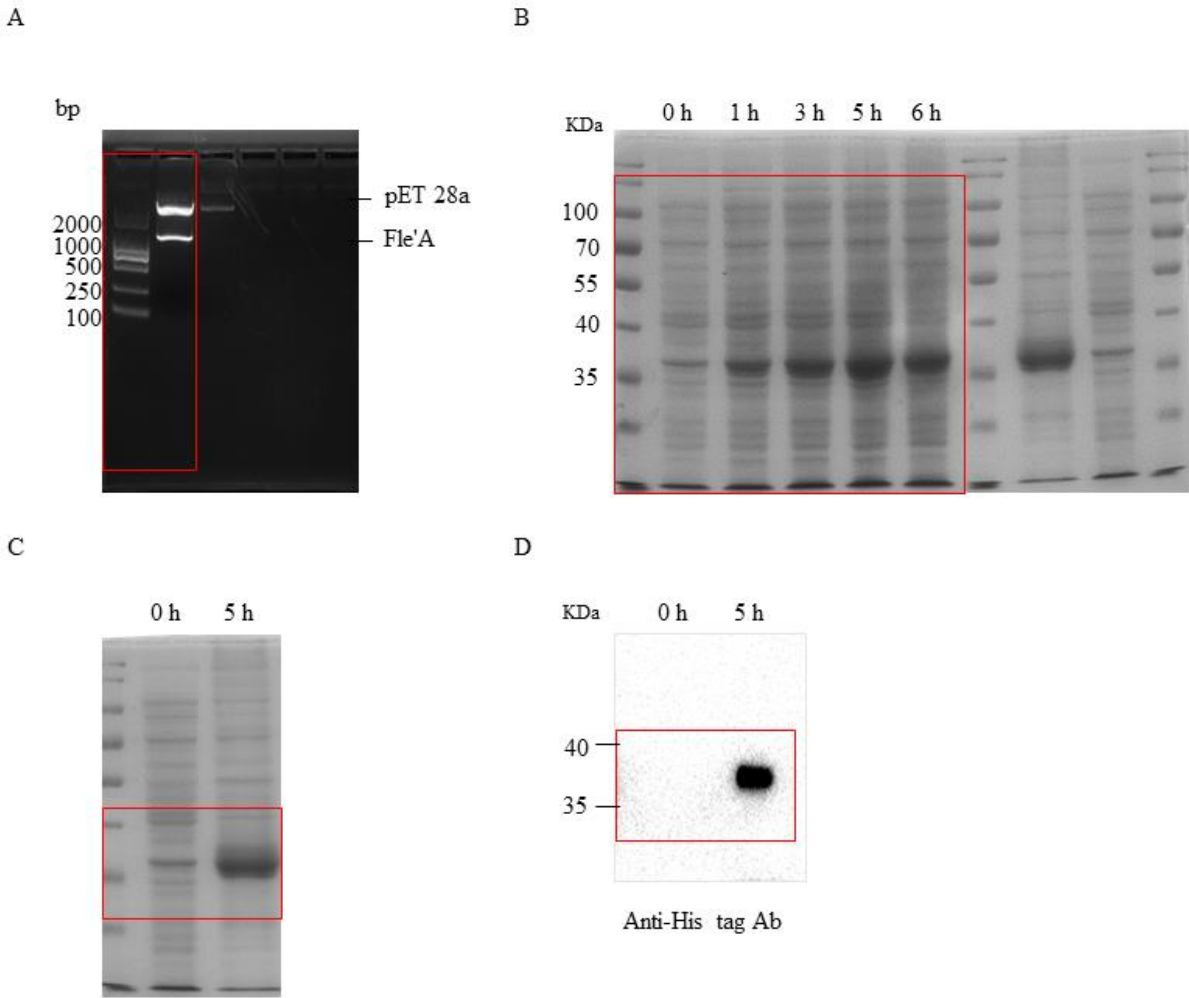

**Supplementary Figure 4:** The full-length gel and blots of Figure 4. A) a full-length gel of Figure 4 in this manuscript; B-D) a full-length blots of Figure 4C-E in this manuscript. Boxed regions were cropped and shown as the figure.

## Supplementary Figure 5

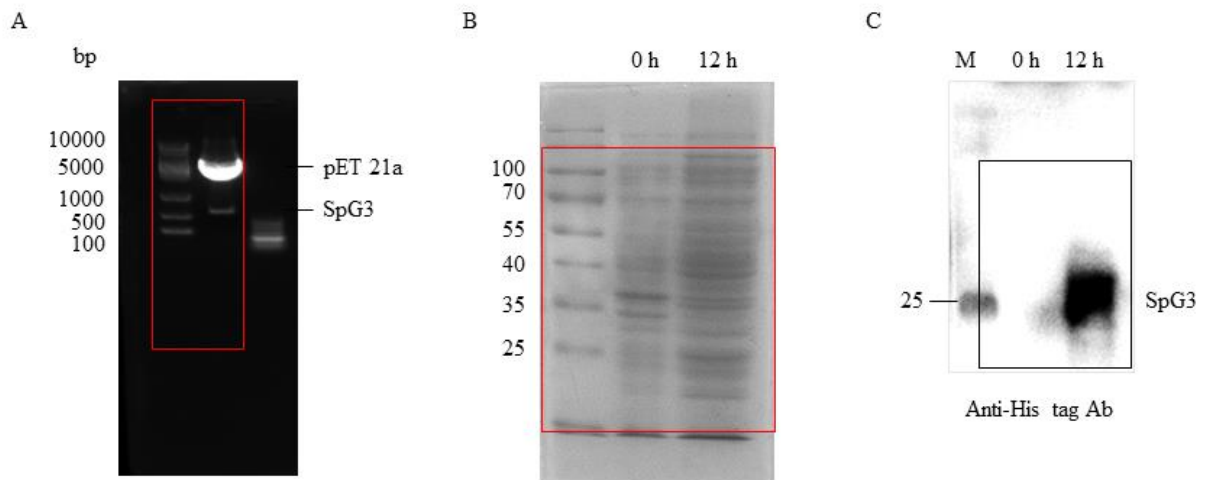

**Supplementary Figure 5:** The full-length gel and blots of Figure 5. A) a full-length gel of Figure 5B in this manuscript; B,C) a full-length blots of Figure 5C,D in this manuscript.

Boxed regions were cropped and shown as the figure.

**Supplementary Table 1. Clinical characteristics of patients with autoimmune disease**

| Patients | Age/Sex/Ethnicity | ANA titer  | Disease |
|----------|-------------------|------------|---------|
| 1        | 62/F/Asian        | 1:100      | RA      |
| 2        | 58/F/Asian        | 1:320      | SLE     |
| 3        | 71/F/Asian        | —          | CTD     |
| 4        | 55/F/Asian        | —          | CTD     |
| 5        | 68/F/Asian        | 1:320-1000 | SLE     |
| 6        | 35/M/Asian        | 1:320      | SLE     |
| 7        | 65/F/Asian        | 1:100-320  | SLE     |
| 8        | 47/F/Asian        | 1:100      | RA      |
| 9        | 37/F/Asian        | 1:320      | SLE     |
| 10       | 28/F/Asian        | 1:100      | RA      |
| 11       | 66/F/Asian        | 1:100      | RA      |
| 12       | 67/F/Asian        | 1:1000     | SLE     |
| 13       | 28/F/Asian        | 1:3200     | RA      |
| 14       | 61/F/Asian        | 1:320-1000 | SLE     |
| 15       | 71/F/Asian        | 1:1000     | SLE     |
| 16       | 61/M/Asian        | 1:320      | RA      |
| 17       | 67/F/Asian        | 1:100      | RA      |
| 18       | 66/F/Asian        | 1:320      | RA      |
| 19       | 53/F/Asian        | 1:1000     | IgAN    |
| 20       | 29/F/Asian        | 1:100      | SLE     |
| 21       | 37/M/Asian        | 1:320      | SLE     |
| 22       | 59/F/Asian        | 1:100      | RA      |

Systemic lupus erythematosus, SLE; Rheumatoid arthritis, RA; Connective tissue disease, CTD; IgA nephropathy, IgAN.



**Supplementary Table 2. Clinical characteristics of patients with SLE**

| Patients | Age/Sex/Ethnicity | Fulfilled 1982        |            |         |
|----------|-------------------|-----------------------|------------|---------|
|          |                   | ACR criteria          | ANA titer  | Disease |
| 1        | 58/F/Asian        | 3, 7, 9, 10, 11       | 1:320      | SLE     |
| 2        | 68/F/Asian        | 1, 5, 7, 9, 10, 11    | 1:320-1000 | SLE     |
| 3        | 35/M/Asian        | 1, 3, 4, 5, 9, 10, 11 | 1:320      | SLE     |
| 4        | 65/F/Asian        | 7, 9, 10, 11          | 1:100-320  | SLE     |
| 5        | 37/F/Asian        | 5, 6, 9, 11           | 1:320      | SLE     |
| 6        | 67/M/Asian        | 3, 5, 6, 9, 10, 11    | 1:1000     | SLE     |
| 7        | 61/F/Asian        | 1, 3, 4, 10, 11       | 1:320-1000 | SLE     |
| 8        | 71/F/Asian        | 5, 6, 7, 9, 10, 11    | 1:1000     | SLE     |
| 9        | 61/F/Asian        | 3, 7, 9, 10, 11       | 1:320      | SLE     |
| 10       | 67/F/Asian        | 1, 4, 5, 11           | 1:100      | SLE     |
| 11       | 66/F/Asian        | 1, 4, 7, 9, 10, 11    | 1:320      | SLE     |
| 12       | 29/F/Asian        | 1, 9, 10, 11          | 1:100      | SLE     |
| 13       | 37/M/Asian        | 7, 9, 10, 11          | 1:320      | SLE     |
| 14       | 53/F/Asian        | 1, 3, 5, 7, 9, 10, 11 | 1:3200     | SLE     |
| 15       | 53/F/Asian        | 1, 5, 6, 7, 9, 10, 11 | 1:3200     | SLE     |
| 16       | 54/F/Asian        | 3, 4, 10, 11          | 1:320-1000 | SLE     |
| 17       | 59/F/Asian        | 1, 6, 7, 9, 10, 11    | 1:1000     | SLE     |
| 18       | 68/F/Asian        | 3, 4, 9, 10, 11       | 1:100-320  | SLE     |
| 19       | 53/F/Asian        | 1, 7, 9, 10, 11       | 1:320-1000 | SLE     |
| 20       | 68/F/Asian        | 1, 4, 10, 11          | 1:100      | SLE     |
| 21       | 60/F/Asian        | 1, 5, 7, 9, 10, 11    | 1:3200     | SLE     |
| 22       | 18/F/Asian        | 3, 5, 10, 11          | 1:320      | SLE     |
| 23       | 37/M/Asian        | 3, 5, 6, 9, 10, 11    | 1:320-1000 | SLE     |
| 24       | 21/F/Asian        | 1, 3, 10, 11          | 1:100      | SLE     |
| 25       | 43/F/Asian        | 1, 3, 9, 10, 11       | 1:100      | SLE     |
| 26       | 39/F/Asian        | 1, 5, 9, 10, 11       | 1:1000     | SLE     |
| 27       | 54/F/Asian        | 5, 7, 9, 10, 11       | 1:320      | SLE     |
| 28       | 20/F/Asian        | 3, 7, 9, 10, 11       | 1:320      | SLE     |
| 29       | 39/F/Asian        | 1, 5, 6, 7, 9, 10, 11 | 1:3200     | SLE     |
| 30       | 23/F/Asian        | 1, 3, 4, 10, 11       | 1:100-320  | SLE     |
| 31       | 59/F/Asian        | 1, 5, 6, 9, 10, 11    | 1:1000     | SLE     |
| 32       | 46/F/Asian        | 1, 3, 5, 7, 9, 10, 11 | 1:3200     | SLE     |
| 33       | 36/F/Asian        | 3, 5, 6, 9, 10, 11    | 1:1000     | SLE     |
| 34       | 52/M/Asian        | 1, 7, 9, 10, 11       | 1:1000     | SLE     |
| 35       | 52/F/Asian        | 7, 9, 10, 11          | 1:1000     | SLE     |
| 36       | 52/F/Asian        | 1, 7, 9, 10, 11       | 1:320-1000 | SLE     |
| 37       | 29/F/Asian        | 3, 4, 9, 10, 11       | 1:320      | SLE     |
| 38       | 30/F/Asian        | 5, 6, 9, 11           | 1:100      | SLE     |
| 39       | 50/F/Asian        | 1, 6, 9, 10, 11       | 1:320      | SLE     |

1. Lupus malar rash; 2. Classic discoid rash; 3. Photosensitive; 4. Oral ulcers; 5. Synovitis; 6. Serositis; 7. Renal; 8. Neurologic; 9. Hemolytic anemia; 10. Immunologic; 11. ANA level above laboratory reference.
